# Supplementary material
Source: PubMed Central journal article supplement (PMC7988950)
Supplement: 12873_2021_425_MOESM1_ESM.pdf [file 12873_2021_425_MOESM1_ESM.pdf]

# COVID Wellness Survey

---

**This survey is VOLUNTARY and ANONYMOUS.**

The EM wellness survey team wants to know about the wellness issues you are facing during the COVID-19 pandemic. We ask that you complete a series of anonymous surveys over the next few weeks. They take 3 mins or less of your time. Our goal is to identify issues and advocate for changes to improve frontline provider wellness.

Collected data is meant to assess needs of our EM providers and improve resources on the departmental, not individual level. Data is managed by the study team and will only be analyzed by in aggregate form to minimize any potential for identification of individual providers. Taking the survey demonstrates consent. There is no penalty for not participating. Please contact the study team for more information.

## Start of Block: Demographics

Q1 Role

---

*Display This Question:*  
*If If Role Text Response Is Equal to Resident*

Q2 Level of Training

---

Q3 Current FTE

---

Q4 Primary Work Site

---

---

*Display This Question:*  
*If If Primary Work Site Text Response Is Equal to Multiple Sites*

Q5 Please select all that apply

---

Q6 Other Work Site

---

Q7 Years since completion of training

---

Q8 Sex

---

Q9 Age

---

End of Block: Demographics

---

---

Q10 Please identify the specific ways your life has been impacted by the COVID-19 pandemic in the past week.

---

Q11 Concerns about my personal safety and/or the safety of family and dependents due to COVID-19 this week.

Yes (1)

No (2)

---

*Display This Question:*

*If Concerns about my personal safety and/or the safety of family and dependents due to COVID-19 this... = Yes*

Q12 Please select the interventions that would make you feel safer at work:

- Additional PPE (1)
- Clean, hospital-provided scrubs (2)
- A place to shower after my shift (3)
- Other (4)

---

*Display This Question:*

*If Please select the interventions that would make you feel safer at work: = Other*

Q13 If other, please list:

---

---

Q14 Basic self care (sleep, hygiene, nutrition, exercise) has been impacted this week.

- Yes (1)
- No (2)

---

*Display This Question:*

*If Basic self care (sleep, hygiene, nutrition, exercise) has been impacted this week. = Yes*

Q15 Check all those that would mitigate the impact on your basic self care

- Help obtaining groceries or toiletries (1)
- A place to sleep at work or near work (2)
- A place to shower after a shift (3)
- Other (4)

---

*Display This Question:*

*If Check all those that would mitigate the impact on your basic self care = Other*

Q16 If other, please list:

---

---

Q17 Ability to care for my children, dependents, and/or pets has been impacted this week.

- Yes (1)
- No (2)

---

*Display This Question:*

*If Ability to care for my children, dependents, and/or pets has been impacted this week. = Yes*

Q18 I need help getting dependent care resources.

- Yes (1)
  - No (2)
-

Q19 I have experienced stress, anxiety, or fear due to COVID-19 this week.

- Yes (1)
- No (2)

---

*Display This Question:*

*If I have experienced stress, anxiety, or fear due to COVID-19 this week. = Yes*

Q20 I have a mentor, colleague, friend, or family member to help me decompress.

- Yes (4)
- No (5)

---

*Display This Question:*

*If I have experienced stress, anxiety, or fear due to COVID-19 this week. = Yes*

Q21 I need mental health resources.

- Yes (4)
- No (5)

---

*Display This Question:*

*If I have experienced stress, anxiety, or fear due to COVID-19 this week. = Yes*

Q22 I need stress-reduction resources.

- Yes (4)
  - No (5)
-

Q23 Strain on my relationships (partner, children, co-workers) due to COVID-19 this week.

Yes (1)

No (2)

---

Q24 Personal illness or illness of a loved one this week.

Yes (1)

No (2)

---

*Display This Question:*

*If Personal illness or illness of a loved one this week. = Yes*

Q25 Have you been quarantined?

Yes (4)

No (5)

---

*Display This Question:*

*If Personal illness or illness of a loved one this week. = Yes*

Q26 Has one of your household contacts been quarantined?

Yes (4)

No (5)

---

Q27 Additional work responsibilities or hours this week due to COVID-19.

Yes (1)

No (2)

---

Q28 I need shift coverage.

Yes (1)

No (2)

---

Q29 Loss of academic/scholarly productivity due to COVID-19 this week.

Yes (1)

No (2)

---

Q30 Feelings of isolation due to COVID-19 this week.

Yes (1)

No (2)

---

*Display This Question:*

*If Feelings of isolation due to COVID-19 this week. = Yes*

Q31 I need resources to combat social isolation.

Yes (1)

No (2)

---

Q32 I feel supported by my leadership.

- Yes (1)
- No (2)

---

*Display This Question:*

*If I feel supported by my leadership. = No*

Q33 I need more support from hospital leadership.

- Yes (4)
- No (5)

---

*Display This Question:*

*If I feel supported by my leadership. = No*

Q34 I need more support from department leadership.

- Yes (1)
- No (2)

**End of Block: COVID Impact**

---

**Start of Block: Well-Being Index**

Q35 The questions below relate to provider wellness.

---

Q36 During the past month, have you felt burned out from your work?

- Yes (4)
  - No (5)
-



Q37 During the past month, have you worried that your work is hardening you emotionally?

Yes (7)

No (8)

---

Q38 During the past month, have you often been bothered by feeling down, depressed, or hopeless?

Yes (4)

No (5)

---

Q39 During the past month, have you fallen asleep while sitting inactive in a public place?

Yes (4)

No (5)

---

Q40 During the past month, have you felt that all the things you had to do were piling up so high that you could not overcome them?

Yes (1)

No (2)

---

Q41 During the past month, have you been bothered by emotional problems (such as feeling anxious, depressed, or irritable)?

Yes (4)

No (5)

---

Q42 During the past month, has your physical health interfered with your ability to do your daily work at home and/or away from home?

Yes (7)

No (8)

---

Q43 Please rate your level of agreement with the following statement: The work I do is meaningful to me.

Very Strongly Agree (4)

Strongly Agree (5)

Agree (6)

Neutral (7)

Disagree (8)

Strongly Disagree (9)

Very Strongly Disagree (10)

---

Q44 Please rate your level of agreement with the following statement: My work schedule leaves me enough time for my personal/family life.

Strongly agree (12)

Agree (13)

Neutral (14)

Disagree (15)

Strongly disagree (16)

End of Block: Well-Being Index

---

Start of Block: Brief Resilience Scale

Q45 Please rate the following statements.

|                                                                  | Strongly agree (13)   | Agree (14)            | Neutral (15)          | Disagree (16)         | Strongly disagree (17) |
|------------------------------------------------------------------|-----------------------|-----------------------|-----------------------|-----------------------|------------------------|
| I tend to bounce back quickly after hard times. (1)              | <input type="radio"/> | <input type="radio"/> | <input type="radio"/> | <input type="radio"/> | <input type="radio"/>  |
| I have a hard time making it through stressful events. (2)       | <input type="radio"/> | <input type="radio"/> | <input type="radio"/> | <input type="radio"/> | <input type="radio"/>  |
| It does not take me long to recover from a stressful event. (3)  | <input type="radio"/> | <input type="radio"/> | <input type="radio"/> | <input type="radio"/> | <input type="radio"/>  |
| It is hard for me to snap back when something bad happens. (4)   | <input type="radio"/> | <input type="radio"/> | <input type="radio"/> | <input type="radio"/> | <input type="radio"/>  |
| I usually come through difficult times with little trouble. (5)  | <input type="radio"/> | <input type="radio"/> | <input type="radio"/> | <input type="radio"/> | <input type="radio"/>  |
| I tend to take a long time to get over setbacks in my life. (20) | <input type="radio"/> | <input type="radio"/> | <input type="radio"/> | <input type="radio"/> | <input type="radio"/>  |

End of Block: Brief Resilience Scale

---

Start of Block: Single Q and text box

Q46 Overall, based on your definition of burnout, how would you rate your level of burnout?

- I enjoy my work. I have no symptoms of burnout. (1)
  - I am under stress, and I don't always have as much energy as I once did, but I don't feel burned out. (4)
  - I am definitely burning out and have one or more symptoms of burnout, such as physical or emotional exhaustion. (5)
  - The symptoms of burnout that I'm experiencing won't go away. I think about frustration at work a lot. (6)
  - I feel completely burned out and often wonder if I can go on. I am at the point where I may need some changes or may need to seek some sort of help. (7)
- 

Q47 Please list the #1 issue affecting your wellness. Also provide any additional comments, ideas, or improvements that could be made to improve wellness.

---

End of Block: Single Q and text box

---
